# Supplementary material
Source: publisher site journal article supplement (https://static.cambridge.org/content/id/urn:cambridge.org:id:article:S0962728600008873/resource/name/Maschat_et_al,_Appendix_Figure5.pdf)
Supplement: Supplementary file 1 [file Maschat_et_al,_Appendix_Figure5.pdf]

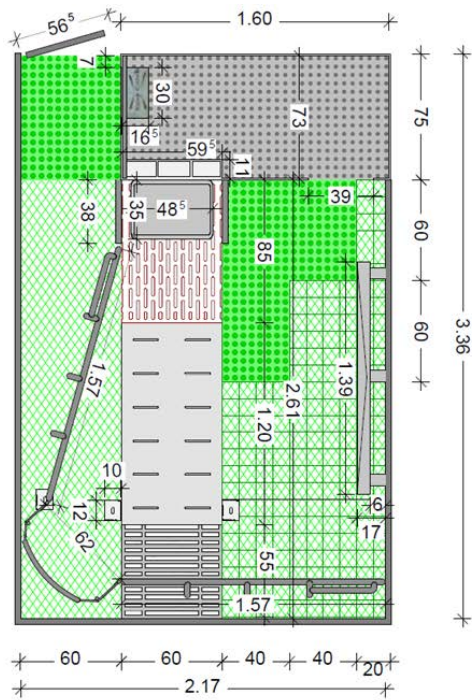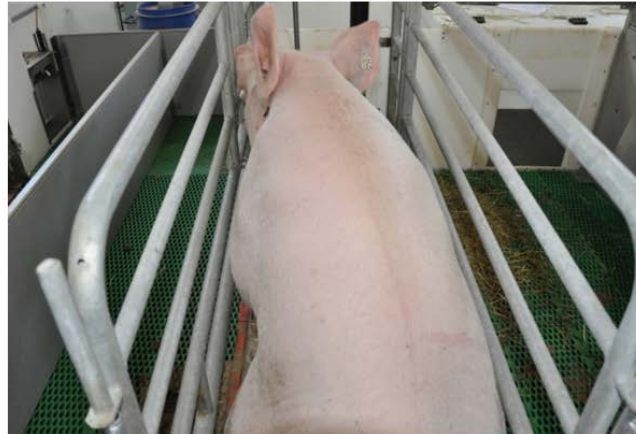

Figure 5: Pro Dromi pen (Vereijken Products B.V., Beek En Donk, Netherlands): plan of modified pen with open crate and photograph of sow in closed crate. Bars of open crate attached on one side to the construction of the trough, on the other to the side wall; both side elements of closed crate fixed to the trough construction (width: 0.62 m, not adjustable). Flexible element to close the crate rearwards. Lowest horizontal bars of the crate mounted at a height of 0.30 m with crate-outwardly directed diagonal pins and two brackets located close to the trough. Flooring: The original pen was equipped with solid metal flooring in the area in front of the trough that was determined as slippery and therefore exchanged at first to a chequer plate and then to minimally slatted solid concrete floor. Also parts of the original slatted floor were removed and replaced by a further developed version with surface profiling (Pro Grip®) and solid plastic floor. Final floor version consisted of minimally slatted solid concrete floor (light grey), original plastic slatted floor (chequered green on the left), Pro Grip® plastic slatted floor (chequered green with rectangles on the right), metal slatted floor with vertical slats (white with red slats), slatted iron cast (dark grey with slats), solid plastic floor (full green and dark grey in the creep area). Sloping wall mounted on one side wall.
